# Supplementary material for: Genome-wide Identification of IRF1 Binding Sites Reveals Extensive Occupancy at Cell Death Associated Genes
Source: PubMed Central journal article supplement (PMC4398980; doi:10.4172/2157-2518.s6-009), 2013
Supplement: NIHMS62608-supplement-Supplementary_Data.pdf [file NIHMS62608-supplement-Supplementary_Data.pdf]

## Supplementary Figure Legends

Supplementary Figure 1. Biological processes of control peak regions. Shown is a graph depicting the p-values of GO biological processes overrepresented in peak-associated genes from control (unstimulated) cells.

Supplementary Figure 2. Enriched motifs from IFN-gamma stimulated cells. Shown are logos from enriched motifs derived from Motif discovery using MEME-ChIP with corresponding e-values (statistical significance).

Supplementary Figure 3. GO biological processes of putative IRF1 gene targets from IRF1 transduced Huh-7 cells. Shown is a graph depicting the p-values of overrepresented GO-biological processes .

Supplementary Table 1. Excel list of annotated genes from the IRF1 ChIP-seq experiment. Shown is the count reads for each ChIP-seq condition, mock (no antibody), control IRF1 antibody, IFN-gamma IRF1 antibody. Chromosomal positions (start-min\_pos and end-max\_pos) are shown for each peak region, followed by the gene ID (Refseq), Gene symbol, strand, start position of the gene and distance of peak region from TSS of the corresponding gene.

Supplementary Table 2. Excel list of transformed expression data from GSE26817. Shown is the GEO2R transformed log<sub>2</sub>ratios (adjusted p-value ≤ 0.05) for genes mapped to the GSE26817 experiment from the IFN-gamma stimulated peak region annotated gene list.

Supplementary Table 3. Excel list of transformed expression data from GSE26817. Shown is the GEO2R transformed log<sub>2</sub>ratios (adjusted p-value ≤ 0.05) for genes mapped to the GSE26817 experiment from the control unstimulated peak region annotated gene list.

Supplementary Table 4. Excel list of transformed expression data from GSE26817. Shown is the GEO2R transformed log<sub>2</sub>ratios (p-value ≤ 0.05) for genes mapped to the GSE26817 experiment from the IFN-gamma stimulated peak region annotated gene list.

## GO Biological Process

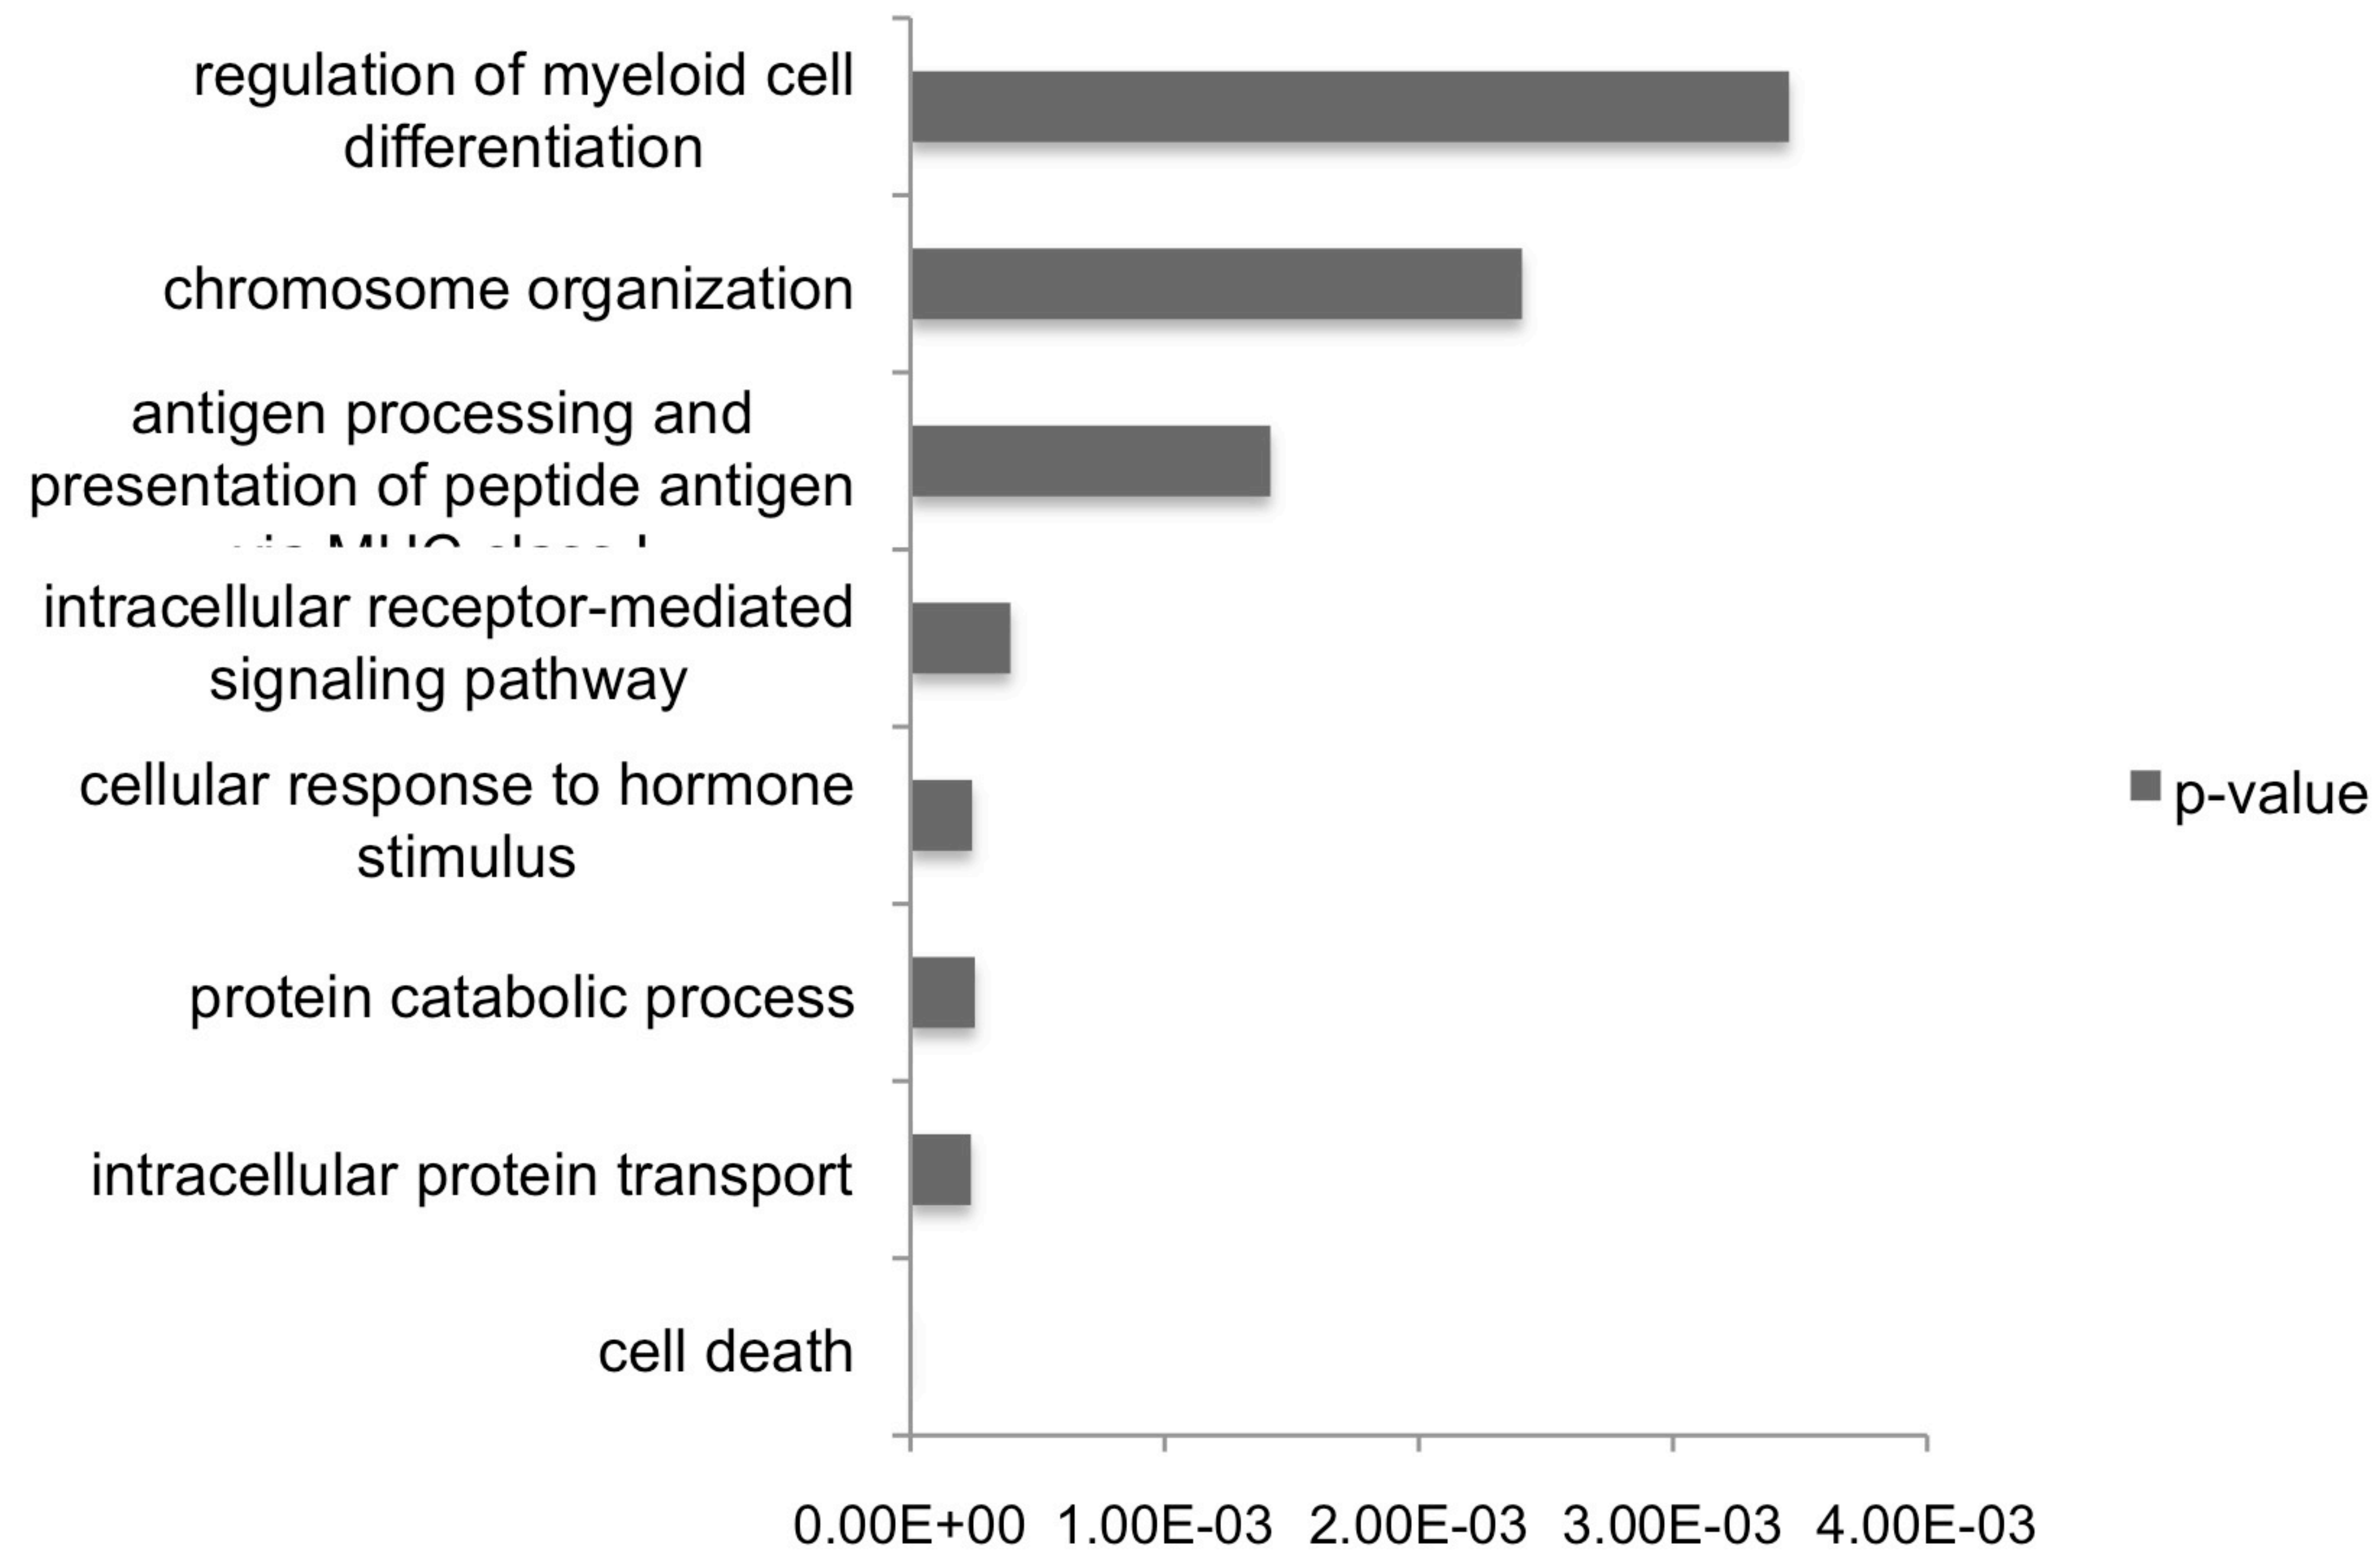

A.

IFN-gamma enriched motifs

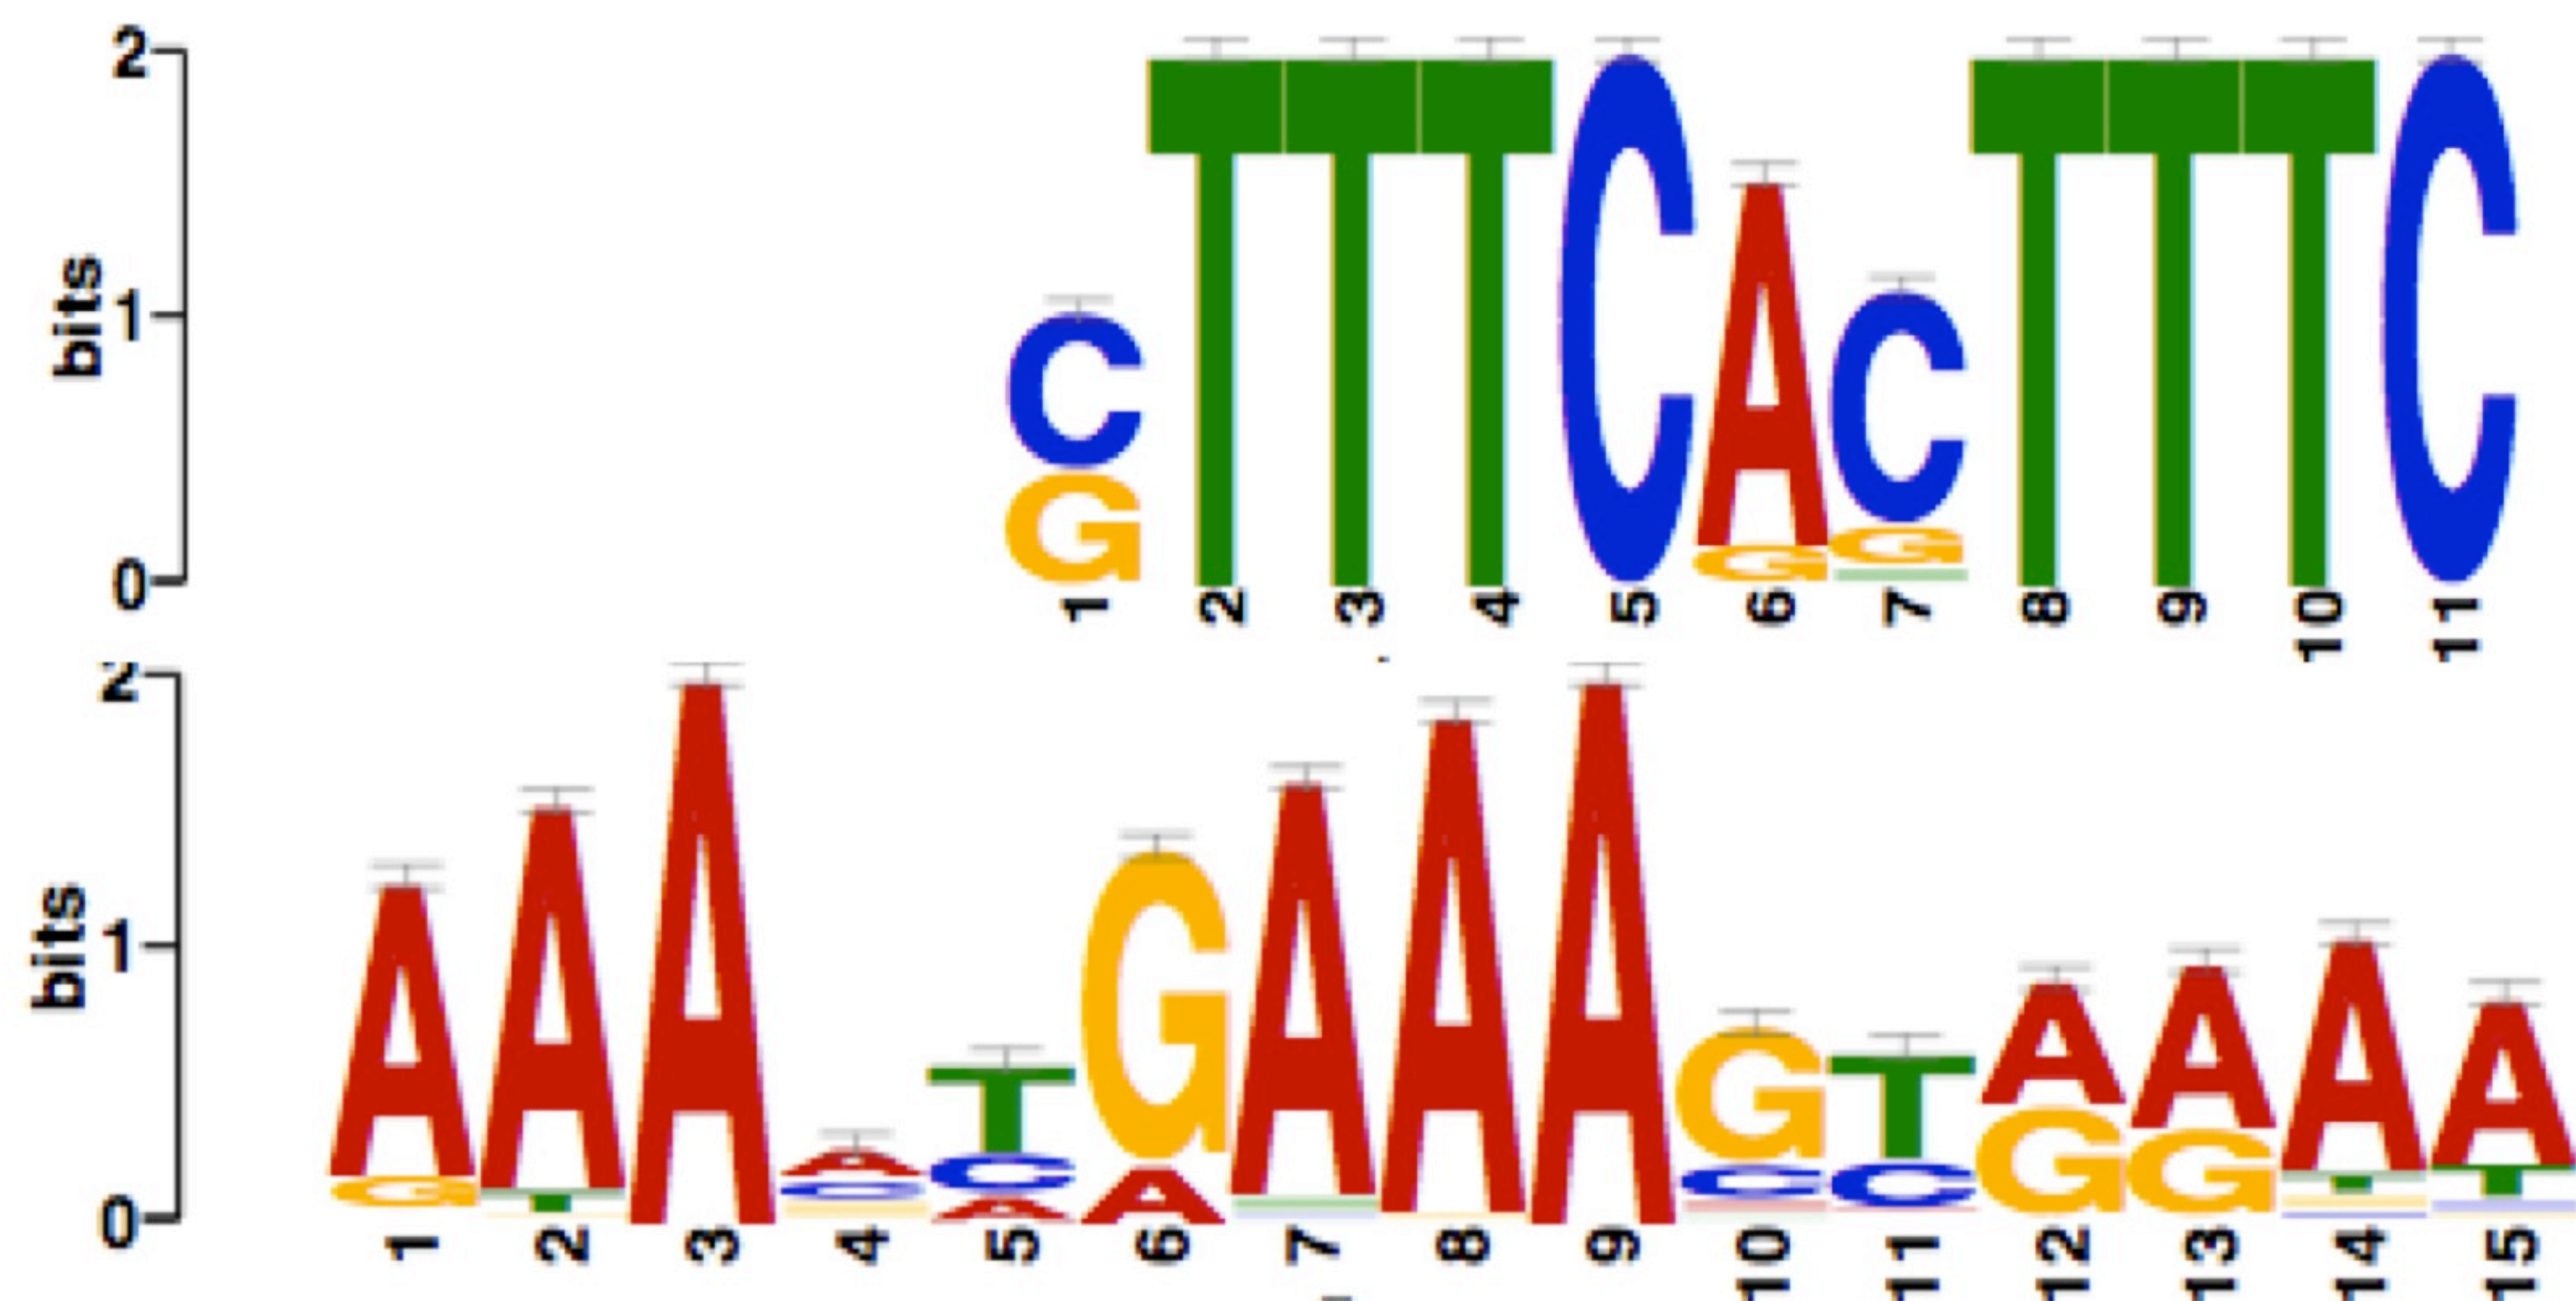

Motif

E-value

7

1.3e-81

5

8.3e-32

B.

IFN-gamma unique enriched motifs

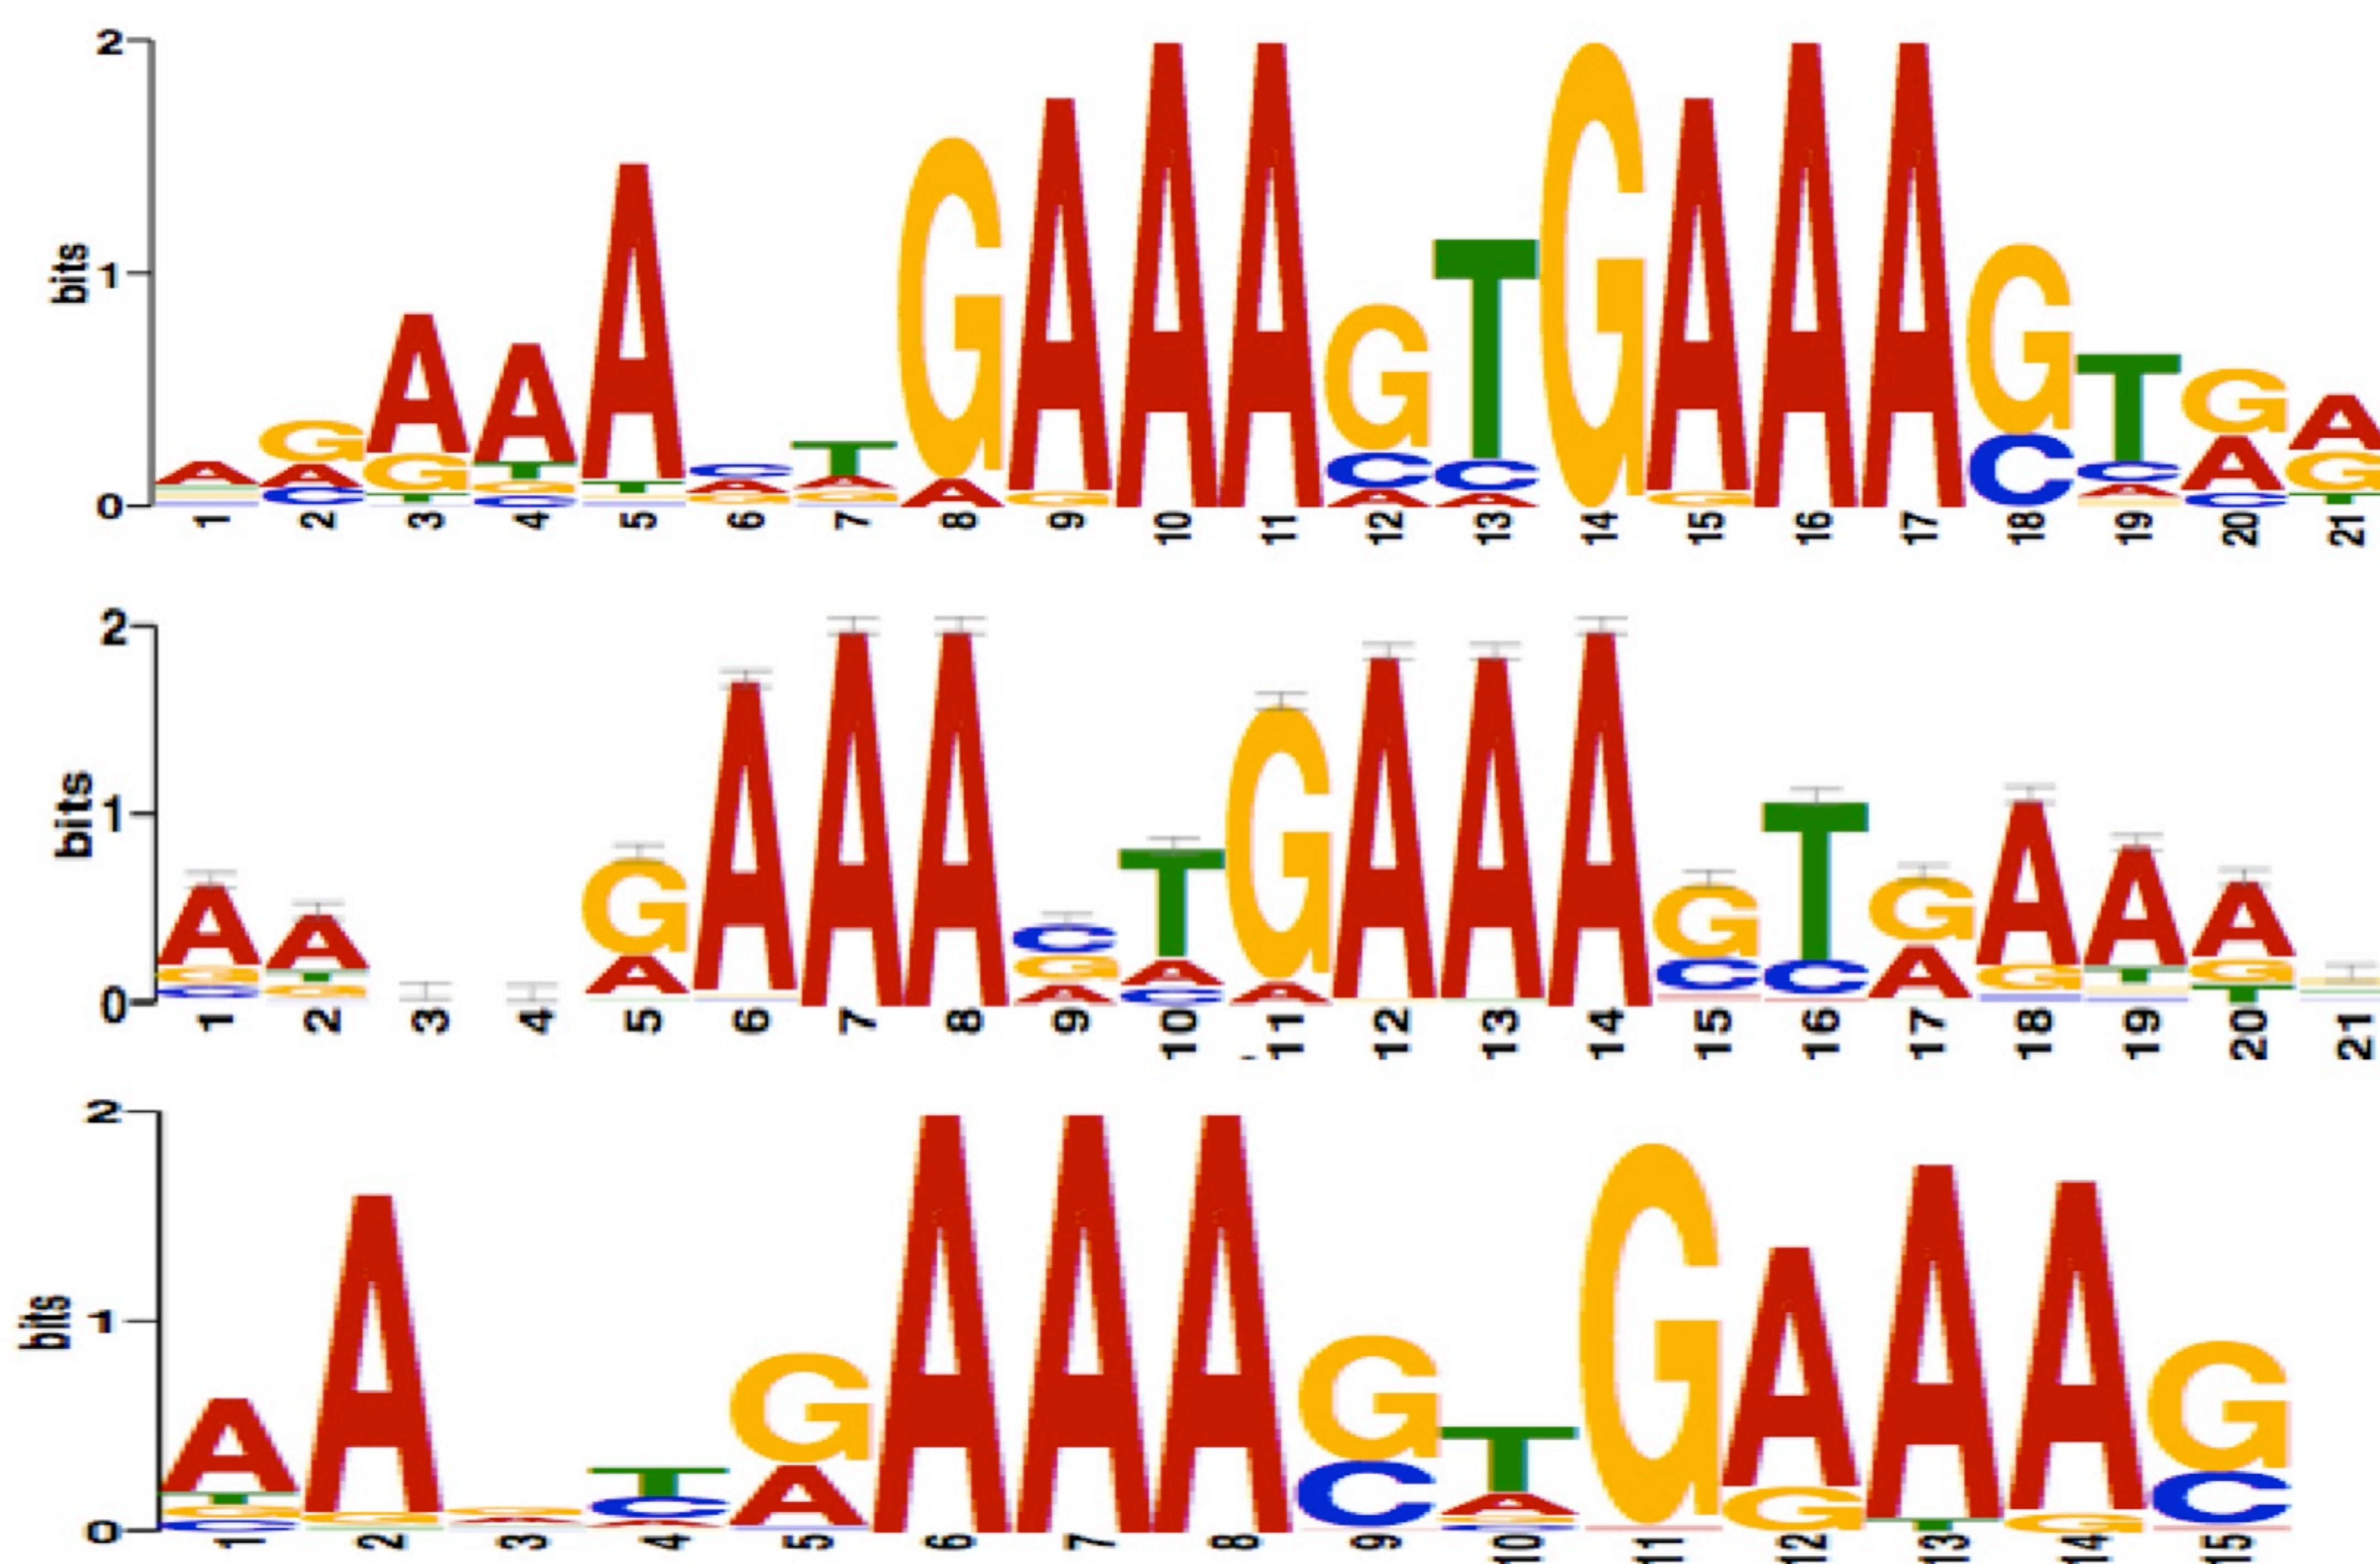

6

3.1e-124

3

1.1e-81

4

3.8e-56

| Go Biological process                                                  | Count | p-value     |
|------------------------------------------------------------------------|-------|-------------|
| response to virus                                                      | 14    | 9.34E-09    |
| antigen processing and presentation of peptide antigen via MHC class I | 7     | 1.18E-07    |
| innate immune response                                                 | 11    | 4.51E-05    |
| JAK-STAT cascade                                                       | 7     | 2.35E-05    |
| negative regulation of protein modification process                    | 10    | 7.82E-05    |
| growth hormone receptor signaling pathway                              | 4     | 1.79E-04    |
| inflammatory response                                                  | 15    | 4.16E-04    |
| leukocyte activation                                                   | 12    | 0.001121147 |
| positive regulation of I-kappaB kinase/NF-kappaB cascade               | 7     | 0.003462038 |
| hemopoiesis                                                            | 10    | 0.009641889 |
| regulation of apoptosis                                                | 22    | 0.009927461 |
